# Supplementary material
Source: publisher figshare collection journal article supplement (https://sage.figshare.com/ndownloader/files/17505305)
Supplement: Supplementary file 1 [file 17505305]

# Supplementary data: Codebook for Deliberative survey on federalism in Myanmar 2018

| General information |                                                       |                                                                                                                                     |
|---------------------|-------------------------------------------------------|-------------------------------------------------------------------------------------------------------------------------------------|
| Variable            | Questions                                             | Values (answers)                                                                                                                    |
| Location            | N/A [entered by administrator]                        | 1=Lashio 1, Shan State<br>2=Lashio 2, Shan State<br>3=Taunggyi, Shan State<br>4=Monywa, Sagaing Region<br>5=Sagaing, Sagaing Region |
| DelQual             | N/A – Deliberative Quality Index average per location | Between 0 and 15                                                                                                                    |
| Date                | Date of event                                         | Day-Month-Year                                                                                                                      |

| Introductory Questions |                                          |                                                                                                  |
|------------------------|------------------------------------------|--------------------------------------------------------------------------------------------------|
| Variable               | Questions                                | Values (answers)                                                                                 |
| Age                    | What year were you born?                 | Year of age                                                                                      |
| Education              | What is your highest level of education? | 1=Primary<br>2=High school<br>3=University                                                       |
| Gender                 | What is your gender?                     | 1=Male<br>2=Female<br>3=Other                                                                    |
| Ethnicity              | With what ethnic group do you identify?  | 1=Bamar<br>2=Chin<br>3=Kachin<br>4=Karen<br>5=Karenni<br>6=Mon<br>7=Rakhine<br>8=Shan<br>9=Other |
| Religion               | What is your religion?                   | 1=Buddhism<br>2=Christianity<br>3=Islam<br>4=Other                                               |

| Knowledge Questions |       |                                                             |                                                                                                                                                                                 |
|---------------------|-------|-------------------------------------------------------------|---------------------------------------------------------------------------------------------------------------------------------------------------------------------------------|
| Variable            |       | Questions                                                   | Answers                                                                                                                                                                         |
| Before              | After |                                                             |                                                                                                                                                                                 |
| K1A                 | K1B   | Federalism is a system of government where:                 | 1=Sovereignty is shared between different tiers of government<br>2=Ethnic nationalities have self-determination<br>3=The central government controls everything<br>4=Don't know |
| K2A                 | K2B   | How many states and regions are there currently in Myanmar? | 1=three<br>2=eight<br>3=fourteen<br>4=don't know                                                                                                                                |
| K3A                 | K3B   | The Panglong Agreement provided for:                        | 1=Autonomy for Chin, Kachin and Shan nationalities<br>2=Autonomy for all ethnic nationalities                                                                                   |

# Supplementary data: Codebook for Deliberative survey on federalism in Myanmar 2018

| Knowledge Questions |       |                                                                         |                                                                                                                  |
|---------------------|-------|-------------------------------------------------------------------------|------------------------------------------------------------------------------------------------------------------|
| Variable            |       | Questions                                                               | Answers                                                                                                          |
| Before              | After |                                                                         |                                                                                                                  |
|                     |       |                                                                         | 3=The establishment of a unitary Burmese nation<br>4=Independence from the British colonial rule<br>5=Don't know |
| K4A                 | K4B   | States and regions in Myanmar can make their own laws?                  | 1=True<br>2=False<br>3=Don't know                                                                                |
| K5A                 | K5B   | The Chamber of Nationalities provides representation in parliament for: | 1=All ethnic nationalities<br>2=All states, regions and self-administered areas<br>3=Don't know                  |
| K1AYN               | K1BYN | See K1A&B<br>Correct answers = 1                                        | 0=Incorrect answer<br>1=Correct answer                                                                           |
| K2AYN               | K2BYN | See K2A&B<br>Correct answers = 3                                        |                                                                                                                  |
| K3AYN               | K3BYN | See K3A&B<br>Correct answers = 1, 4                                     |                                                                                                                  |
| K4AYN               | K4BYN | See K4A&B<br>Correct answers = 1                                        |                                                                                                                  |
| K5AYN               | K5BYN | See K5A&B<br>Correct answers = 1, 2                                     |                                                                                                                  |

| General Questions |       |                                                                   |                                                                               |
|-------------------|-------|-------------------------------------------------------------------|-------------------------------------------------------------------------------|
| Variable          |       | Questions                                                         | Values (answers)                                                              |
| Before            | After |                                                                   |                                                                               |
| G1A               | G1B   | Myanmar should have federalism                                    | 1=Strongly disagree<br>2=Disagree<br>3=Neutral<br>4=Agree<br>5=Strongly agree |
| G2A               | G2B   | States should be based on ethnicity                               |                                                                               |
| G3A               | G3B   | All states and regions should have equal powers                   |                                                                               |
| G4A               | G4B   | All ethnic nationalities should have their own state              |                                                                               |
| G5A               | G5B   | Myanmar is a Bamar state                                          |                                                                               |
| G6A               | G6B   | States and regions should have their own constitutions            |                                                                               |
| G7A               | G7B   | Small ethnic groups should have a self-administered area          |                                                                               |
| G8A               | G8B   | All the existing regions should be merged to form one Bamar state |                                                                               |
| G9A               | G9B   | Federalism will lead to secession                                 |                                                                               |
| G10A              | G10B  | Most Bamar are trustworthy                                        |                                                                               |
| G11A              | G11B  | Myanmar should be a secular state                                 |                                                                               |
| G12A              | G12B  | The Union government should have responsibility for education     |                                                                               |
| G13A              | G13B  | Most ethnic nationalities are open to reason                      |                                                                               |
| G14A              | G14B  | Myanmar is federal now                                            |                                                                               |

**Supplementary data: Codebook for Deliberative survey on federalism in Myanmar 2018**

| General Questions |       |                                                                                                |                  |
|-------------------|-------|------------------------------------------------------------------------------------------------|------------------|
| Variable          |       | Questions                                                                                      | Values (answers) |
| Before            | After |                                                                                                |                  |
| G15A              | G15B  | The Union should collect and distribute equally the revenue from natural resources             |                  |
| G16A              | G16B  | Myanmar is a multinational country                                                             |                  |
| G17A              | G17B  | Most ethnic nationalities want independence                                                    |                  |
| G18A              | G18B  | Schools in ethnic states should teach in local language(s)                                     |                  |
| G19A              | G19B  | ‘Ethnic nationalities’ is an appropriate term for non-Bamar groups                             |                  |
| G20A              | G20B  | There should be equality between all ethnic groups in Myanmar regardless of size               |                  |
| G21A              | G21B  | Most ethnic nationalities are trustworthy                                                      |                  |
| G22A              | G22B  | Buddhism should have a special place in the constitution                                       |                  |
| G23A              | G23B  | All citizens of Myanmar should have a single shared national identity                          |                  |
| G24A              | G24B  | States and regions should have responsibility for law and order                                |                  |
| G25A              | G25B  | Most Bamar are open to reason                                                                  |                  |
| G26A              | G26B  | Self-administered areas should have the same powers as states and regions                      |                  |
| G27A              | G27B  | Myanmar is a Bamar country                                                                     |                  |
| G28A              | G28B  | There should be equality between all the state and regions in Myanmar regardless of size       |                  |
| G29A              | G29B  | States and regions should control their natural resources, independent of the Union government |                  |
| G30A              | G30B  | It is inevitable that Myanmar will become federal                                              |                  |
| G31A              | G31B  | Myanmar should recognise that different ethnic groups have different identities                |                  |
| G32A              | G32B  | States should be based on geography and the economy                                            |                  |
| G33A              | G33B  | I am optimistic about the future of Myanmar                                                    |                  |

| Participation Questions |                                                                                  |                                   |
|-------------------------|----------------------------------------------------------------------------------|-----------------------------------|
| Variable                | Questions                                                                        | Values (answers)                  |
| P1                      | The deliberative event was a worthwhile use of my time                           | 1=Strongly disagree<br>2=Disagree |
| P2                      | Members in my group usually provided rational reasons to explain their viewpoint | 3=Neutral<br>4=Agree              |
| P3                      | My group was dominated by a small number of people                               | 5=Strongly agree                  |
